# Supplementary figures and images for: Electrochemical determination of hydroquinone using hydrophobic ionic liquid-type carbon paste electrodes
Source: Springer Nature journal article supplement (doi:10.1186/1752-153x-4-17), 2010-10-26

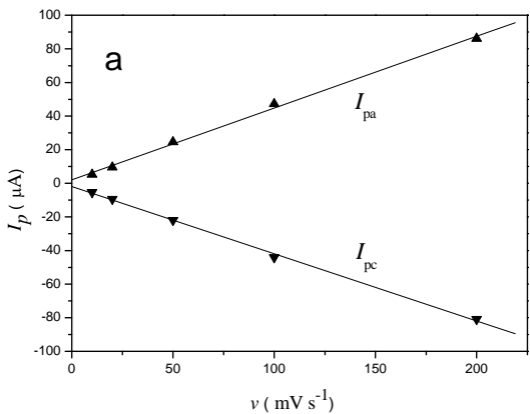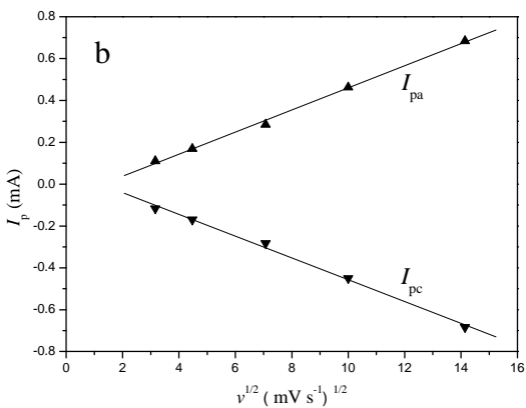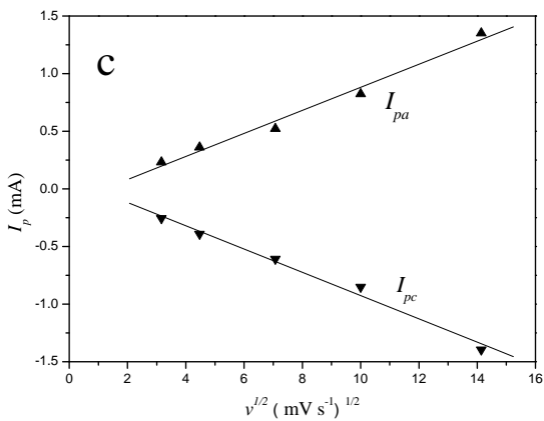

Supplement: 13065_2010_264_MOESM2_ESM.pdf [file 13065_2010_264_MOESM2_ESM.pdf]
